# Supplementary material for: The Expression of Genes Related to Lipid Metabolism and Metabolic Disorders in Children before and after Hematopoietic Stem Cell Transplantation—A Prospective Observational Study
Source: MDPI journal article supplement (doi:10.3390/cancers13143614), 2021-07-19
Supplement: s1 [file s1]

**Table S1.** Difference in the expression of 22 significantly changed genes in children undergoing the HSCT procedure.

| Gene symbol      | Locus and Affimetrix code | pre-HSCT<br><i>N</i> = 27 | post-HSCT<br><i>N</i> = 27 | pre-HSCT vs.<br>post-HSCT |                          |
|------------------|---------------------------|---------------------------|----------------------------|---------------------------|--------------------------|
|                  |                           |                           |                            | <i>FC</i>                 | p/p <sup>BH</sup> -Value |
| <i>DPP4</i>      | 2q24.2<br>8056222         | 8.91 ± 0.56               | 7.85 ± 0.68                | 2.07                      | 10 <sup>-8</sup> /0.0004 |
| <i>PLAG1</i>     | 8q12.1<br>8150881         | 6.09 ± 0.47               | 5.66 ± 0.33                | 1.34                      | 10 <sup>-5</sup> /0.04   |
| <i>SCD</i>       | 10q24.31<br>7929816       | 6.97 ± 0.48               | 6.54 ± 0.33                | 1.35                      | 10 <sup>-6</sup> /0.01   |
| <i>BPGM</i>      | 7q33<br>8136341           | 9.05 ± 1.18               | 7.97 ± 0.51                | 2.11                      | 10 <sup>-6</sup> /0.01   |
| <i>AHSP</i>      | 16p11.2<br>7995237        | 8.99 ± 2.21               | 6.50 ± 1.15                | 5.62                      | 10 <sup>-6</sup> /0.01   |
| <i>GYP A</i>     | 4q31.21<br>8102998        | 7.04 ± 1.85               | 5.18 ± 0.86                | 3.62                      | 10 <sup>-6</sup> /0.02   |
| <i>NR3C2</i>     | 4q31.23<br>8103094        | 6.55 ± 0.58               | 5.80 ± 0.46                | 1.68                      | 10 <sup>-6</sup> /0.02   |
| <i>HMBS</i>      | 11.q23.3<br>7944401       | 7.77 ± 0.84               | 7.23 ± 0.52                | 1.45                      | 10 <sup>-6</sup> /0.02   |
| <i>C1orf228</i>  | 1p34.1<br>7900999         | 7.02 ± 0.22               | 6.74 ± 0.26                | 1.21                      | 10 <sup>-6</sup> /0.02   |
| <i>MYB</i>       | 6q23.3<br>8122202         | 7.78 ± 0.69               | 7.41 ± 0.35                | 1.29                      | 10 <sup>-6</sup> /0.02   |
| <i>CAI</i>       | 8q21.2<br>8151592         | 10.08 ± 2.24              | 7.25 ± 1.68                | 7.14                      | 10 <sup>-5</sup> /0.02   |
| <i>STRADB</i>    | 2q33.1<br>8047443         | 10.19 ± 1.14              | 9.15 ± 0.59                | 2.05                      | 10 <sup>-5</sup> /0.02   |
| <i>ST13</i>      | 22q13.2<br>8076272        | 9.62 ± 0.28               | 9.20 ± 0.27                | 1.34                      | 10 <sup>-5</sup> /0.02   |
| -                | 2q33.1<br>7901336         | 10.46 ± 1.18              | 9.30 ± 0.64                | 2.22                      | 10 <sup>-5</sup> /0.02   |
| <i>ALAS2</i>     | Xp11.21<br>8173135        | 10.35 ± 2.03              | 8.12 ± 1.44                | 4.71                      | 10 <sup>-5</sup> /0.03   |
| <i>IFIT1B</i>    | 10q23.31<br>7929061       | 7.76 ± 1.94               | 5.93 ± 1.03                | 3.55                      | 10 <sup>-5</sup> /0.03   |
| -                | 8p<br>8146157             | 4.02 ± 0.57               | 3.55 ± 0.27                | 1.39                      | 10 <sup>-5</sup> /0.04   |
| <i>SPIN3</i>     | Xp11.21<br>8173181        | 6.67 ± 0.23               | 6.39 ± 0.26                | 1.21                      | 10 <sup>-5</sup> /0.04   |
| <i>TCEA3</i>     | 1p36.12<br>7913593        | 7.39 ± 0.49               | 6.95 ± 0.30                | 1.35                      | 10 <sup>-5</sup> /0.04   |
| <i>ST13P5</i>    | 11p15.1<br>7938756        | 8.40 ± 0.32               | 8.10 ± 0.27                | 1.23                      | 10 <sup>-5</sup> /0.04   |
| <i>RNF157</i>    | 17q25.1<br>8018652        | 8.52 ± 0.60               | 7.93 ± 0.47                | 1.51                      | 10 <sup>-5</sup> /0.04   |
| <i>KIAA0226L</i> | 13q14.1<br>7971486        | 7.35 ± 0.80               | 8.12 ± 0.61                | -1.71                     | 10 <sup>-5</sup> /0.04   |

The expression of genes is given here as log<sub>2</sub> of the raw expression data.

**Table S2.** Results of laboratory analysis in children with HSCT procedure (44 subjects).

| Parameter                                 | pre-HSCT<br>N = 44 | post-HSCT<br>N = 27 | p-Value          |
|-------------------------------------------|--------------------|---------------------|------------------|
| Glc[T <sub>0</sub> ] (mmol/L)             | 4.48±0.59          | 4.45±0.59           | 0.69             |
| Glc[T <sub>60</sub> ] (mmol/L)            | 6.38±1.06          | 5.91±0.91           | 0.37             |
| Glc[T <sub>120</sub> ] (mmol/L)           | 5.59±1.49          | 5.4±1.05            | 0.69             |
| AUC glc (mmol/L/h)                        | 11.4±1.51          | 10.85±1.32          | 0.57             |
| TC (mmol/L)                               | 3.45±1.01          | 3.92±0.89           | <b>0.002</b>     |
| HDL-C (mmol/L)                            | 1.07±0.36          | 1.36±0.51           | <b>0.016</b>     |
| LDL-C (mmol/L)                            | 1.62±0.92          | 1.86±0.8            | <b>0.045</b>     |
| HDL-C/TC                                  | 0.32±0.11          | 0.35±0.12           | 0.37             |
| TG (mmol/L)                               | 1.68±0.68          | 1.54±0.61           | 0.25             |
| hsCRP (mg/L)                              | 9.8±13.35          | 6.99±11.22          | 0.75             |
| Insulin[T <sub>0</sub> ] (mIU/L)          | 14.4±13.3          | 11.28±9.47          | 0.31             |
| Insulin[T <sub>60</sub> ] (mIU/L)         | 57.88±50.59        | 38.09±46.67         | <b>0.045</b>     |
| Insulin[T <sub>120</sub> ] (mIU/L)        | 42.3±48.93         | 28.56±32.54         | 0.30             |
| AUC insulin (mIU/L/h)                     | 91.41±85.2         | 60.48±66.38         | 0.12             |
| Leptin[T <sub>0</sub> ] (µg/L)            | 17.56±27.25        | 11.3±21.38          | <b>0.037</b>     |
| Leptin[T <sub>60</sub> ] (µg/L)           | 17.82±26.41        | 10.31±19.17         | <b>&lt;0.001</b> |
| Leptin[T <sub>120</sub> ] (µg/L)          | 17.66±25.63        | 11.36±22.8          | <b>0.001</b>     |
| AUC leptin (µg/L/h)                       | 36.12±53.75        | 21.88±17.43         | <b>0.001</b>     |
| Leptin receptor[T <sub>0</sub> ] (µg/L)   | 24.38±22.99        | 28.89±23.77         | 0.43             |
| Leptin receptor[T <sub>60</sub> ] (µg/L)  | 25.16±24.3         | 28.86±21.04         | 0.11             |
| Leptin receptor[T <sub>120</sub> ] (µg/L) | 24.86±25.91        | 29.13±22.51         | 0.26             |
| AUC leptin receptor (µg/L/h)              | 50.25±48.72        | 58.13±43.94         | 0.14             |
| HOMA-IR                                   | 2.98±2.8           | 1.82±1.97           | 0.40             |
| Insulin resistance (N, %)                 | 14(31.82%)         | 5(27.78%)           | 0.27             |

**Table S3.** Results of laboratory analysis in children with HSCT procedure with focus on the indication for the transplantations (neoplasm or non-neoplasm).

| Parameter                                 | pre-HSCT           |                       |         | post-HSCT          |                       |         |
|-------------------------------------------|--------------------|-----------------------|---------|--------------------|-----------------------|---------|
|                                           | neoplasm<br>N = 18 | non-neoplasm<br>N = 9 | p-Value | neoplasm<br>N = 18 | non-neoplasm<br>N = 9 | p-Value |
| Glc[T <sub>0</sub> ] (mmol/L)             | 4.4±0.6            | 4.5±0.5               | 0.5     | 4.4±0.4            | 4.6±0.9               | 0.4     |
| Glc[T <sub>60</sub> ] (mmol/L)            | 6.2±1.1            | 6.3±0.8               | 0.9     | 5.8±0.7            | 6.0±1.2               | 0.6     |
| Glc[T <sub>120</sub> ] (mmol/L)           | 5.5±1.5            | 5.5±1.9               | 0.9     | 5.7±0.7            | 5.0±1.4               | 0.2     |
| AUC glc (mmol/L/h)                        | 11.0±1.4           | 11.3±1.5              | 0.7     | 10.9±0.9           | 10.8±1.8              | 1.0     |
| TC (mmol/L)                               | 3.2±1.0            | 3.5±1.2               | 0.5     | 3.9±1.0            | 3.9±0.6               | 1.0     |
| HDL-C (mmol/L)                            | 1.1±0.4            | 0.9±0.3               | 0.3     | 1.4±0.5            | 1.4±0.5               | 0.9     |
| LDL-C (mmol/L)                            | 1.2±0.9            | 1.9±1.0               | 0.1     | 1.9±0.9            | 1.8±0.6               | 0.7     |
| HDL-C/TC                                  | 0.4±0.1            | 0.3±0.1               | 0.1     | 0.4±0.1            | 0.3±0.1               | 0.8     |
| TG (mmol/L)                               | 1.9±0.8            | 1.5±0.6               | 0.2     | 1.4±0.5            | 1.8±0.7               | 0.2     |
| Insulin[T <sub>0</sub> ] (mIU/L)          | 12.6±9.8           | 15.5±19.1             | 0.6     | 8.1±4.7            | 17.2±13.3             | 0.1     |
| Insulin[T <sub>60</sub> ] (mIU/L)         | 44.3±25.4          | 78.4±87.8             | 0.3     | 31.1±28.6          | 31.1±68.8             | 0.3     |
| Insulin[T <sub>120</sub> ] (mIU/L)        | 28.6±22.5          | 75.5±89.1             | 0.2     | 21.0±13.9          | 42.1±49.9             | 0.2     |
| AUC insulin (mIU/L/h)                     | 64.1±33.6          | 149.2±165.8           | 0.3     | 46.3±35.4          | 85.3±98.9             | 0.2     |
| Leptin[T <sub>0</sub> ] (µg/L)            | 12.3±20.5          | 15.5±21.0             | 0.7     | 10.3±19.5          | 13.2±25.6             | 0.8     |
| Leptin[T <sub>60</sub> ] (µg/L)           | 15.1±25.6          | 16.9±21.4             | 0.9     | 8.1±17.7           | 15.4±22.8             | 0.4     |
| Leptin[T <sub>120</sub> ] (µg/L)          | 13.9±23.9          | 22.3±25.4             | 0.4     | 8.9±21.5           | 17.0±26.5             | 0.4     |
| AUC leptin (µg/L/h)                       | 23.7±44.5          | 45.5±49.0             | 0.4     | 17.3±38.3          | 32.4±50.2             | 0.4     |
| Leptin receptor[T <sub>0</sub> ] (µg/L)   | 19.8±9.9           | 43.7±41.7             | 0.1     | 28.1±22.6          | 30.4±27.2             | 0.8     |
| Leptin receptor[T <sub>60</sub> ] (µg/L)  | 20.1±10.3          | 52.8±46.5             | 0.1     | 27.8±19.2          | 30.8±25.1             | 0.7     |
| Leptin receptor[T <sub>120</sub> ] (µg/L) | 19.6±12.9          | 49.2±48.4             | 0.1     | 27.8±19.5          | 31.4±28.2             | 0.7     |
| AUC leptin receptor (µg/L/h)              | 39.8±20.6          | 106.4±92.8            | 0.1     | 56.1±40.2          | 61.7±52.4             | 0.8     |
| HOMA-IR                                   | 2.0±2.2            | 2.5±3.6               | 0.6     | 1.3±1.0            | 2.7±2.9               | 0.2     |
| hsCRP (mg/L)                              | 4.8±4.3            | 12.5±15.4             | 0.2     | 7.3±12.2           | 6.4±9.9               | 0.8     |
| Insulin resistance (N, %)                 | 5 (28)             | 4 (44)                | 0.7     | 2 (11)             | 4 (44)                | 0.1     |

|                                      |         |         |     |         |        |     |
|--------------------------------------|---------|---------|-----|---------|--------|-----|
| Dyslipidemia: abnormal TC (N, %)     | 0 (0)   | 1 (11)  | 0.7 | 2 (11)  | 0 (0)  | 0.5 |
| Dyslipidemia: abnormal TG (N, %)     | 12 (67) | 5 (56)  | 0.3 | 7 (39)  | 7 (78) | 0.1 |
| Dyslipidemia: abnormal HDL-C (N, %)  | 11 (61) | 7 (78)  | 0.7 | 7 (39)  | 3 (33) | 0.7 |
| Dyslipidemia: abnormal LDL-C (N, %)  | 0 (0)   | 1 (11)  | 0.4 | 0 (0)   | 0 (0)  | 1.0 |
| Dyslipidemia: any abnormality (N, %) | 15 (83) | 9 (100) | 1.0 | 11 (61) | 8 (89) | 0.4 |

“Dyslipidemia: any abnormality” means at least one abnormal of: TC (>5 mmol/L), TG (>1.1 mmol/L (age 0-9) or >1.5 mmol/L (age 10-18)), HDL-C (<1 mmol/L) and LDL-C (>3.2 mmol/L).

**Table S4.** Anthropometric characteristics in children with HSCT procedure.

|                              | pre-HSCT<br>N = 27 | post-HSCT<br>N = 27 | p/p <sup>BH</sup> -Value<br>pre-HSCT vs.<br>post-HSCT |
|------------------------------|--------------------|---------------------|-------------------------------------------------------|
| BMI WHO (kg/m <sup>2</sup> ) | 19.0 ± 4.2         | 18.4 ± 3.5          | 0.2/-                                                 |
| BMI WHO percentile           | 61.3 ± 31.1        | 53.0 ± 35.4         | 0.2/-                                                 |
| TBW (L)                      | 27.7 ± 19.8        | 22.4 ± 9.1          | 0.6/-                                                 |
| ECW (L)                      | 13.7 ± 14.8        | 10.1 ± 4.0          | 0.2/-                                                 |
| BF[kg]                       | 11.8 ± 17.9        | 7.5 ± 4.9           | 0.6/-                                                 |
| BF[%]                        | 18.7 ± 14.8        | 17.7 ± 6.9          | 0.7/-                                                 |
| LBM[kg]                      | 34.0 ± 16.1        | 30.7 ± 12.6         | 0.8/-                                                 |

**Table S5.** Anthropometric characteristics in children with HSCT procedure and their counterparts from the control groups (44 HSCT subjects).

| Parameters                   | pre-HSCT<br>N = 44 | post-HSCT<br>N = 27 | p-Value<br>pre-HSCT vs.<br>post-HSCT |
|------------------------------|--------------------|---------------------|--------------------------------------|
| BMI WHO (kg/m <sup>2</sup> ) | 19.02±4.21         | 18.35±3.47          | 0.16                                 |
| BMI WHO percentile           | 61.26±31.12        | 53±35.41            | 0.17                                 |
| TBW (L)                      | 27.65±19.83        | 22.39±9.07          | 0.64                                 |
| BF[kg]                       | 11.77±17.94        | 7.48±4.87           | 0.61                                 |
| BF[%]                        | 18.65±14.84        | 17.68±6.88          | 0.73                                 |
| LBM[kg]                      | 33.95±16.18        | 30.65±12.57         | 0.82                                 |
| ECW (L)                      | 13.71±14.84        | 10.05±3.96          | 0.16                                 |

**Table S6.** Difference in the expression of genes in children undergoing the HSCT procedure with focus on the indication for the transplantations (neoplasm or non-neoplasm).

| Gene symbol | Locus and Affimatrix code | pre-HSCT           |                       |      |                          | post-HSCT          |                       |       |                          |
|-------------|---------------------------|--------------------|-----------------------|------|--------------------------|--------------------|-----------------------|-------|--------------------------|
|             |                           | neoplasm<br>N = 18 | non-neoplasm<br>N = 9 | FC   | p/p <sup>BH</sup> -Value | neoplasm<br>N = 18 | non-neoplasm<br>N = 9 | FC    | p/p <sup>BH</sup> -Value |
| DPP4        | 2q24.2<br>8056222         | 8.69±0.78          | 8.63±0.73             | 1.04 | 1.0/1.0                  | 7.95±0.78          | 8.24±0.50             | -1.22 | 0.3/1.0                  |

**Table S7.** Correlation between the expression (or its change  $\Delta_{\text{mean}}$  and relative change  $\Delta_{\text{mean}(\text{rel})}$ ) of genes associated with lipid metabolism and its parameters in children undergoing HSCT procedure.

| Lipid metabolism parameter                                                                    | Gene                | Pre-HSCT gene expression and pre-HSCT lipid metabolism parameters |           | Post-HSCT gene expression and post-HSCT lipid metabolism parameters | Pre-HSCT gene expression and post-HSCT lipid metabolism parameters | Gene expression change ( $\Delta_{\text{mean}}$ ) and post-HSCT lipid metabolism parameters | Gene expression relative change ( $\Delta_{\text{mean}(\text{rel})}$ ) and post-HSCT lipid metabolism parameters (%) |       |         |
|-----------------------------------------------------------------------------------------------|---------------------|-------------------------------------------------------------------|-----------|---------------------------------------------------------------------|--------------------------------------------------------------------|---------------------------------------------------------------------------------------------|----------------------------------------------------------------------------------------------------------------------|-------|---------|
|                                                                                               |                     |                                                                   |           |                                                                     |                                                                    |                                                                                             | Spearmann's correlation coefficient r and p/p <sup>BH</sup> -Value                                                   |       |         |
| TC                                                                                            | DPP4                | 0.48, 0.02/0.06                                                   |           | -0.42, 0.03/0.1                                                     | -0.02, 0.9/-                                                       | 0.02, 0.9/-                                                                                 | -0.42, 0.03/0.1                                                                                                      |       |         |
|                                                                                               | PLAG1               | 0.33, 0.1/0.2                                                     |           | 0.30, 0.1/0.2                                                       | 0.30, 0.1/0.3                                                      | 0.22, 0.3/0.9                                                                               | 0.23, 0.3/0.6                                                                                                        |       |         |
|                                                                                               | SCD                 | -0.13, 0.6/0.6                                                    |           | 0.05, 0.8/0.8                                                       | 0.09, 0.7/-                                                        | -0.14, 0.5/-                                                                                | -0.08, 0.7/0.7                                                                                                       |       |         |
| HDL-C                                                                                         | DPP4                | 0.23, 0.3/0.9                                                     |           | 0.04, 0.9/-                                                         | -0.31, 0.1/0.3                                                     | -0.18, 0.4/-                                                                                | -0.15, 0.5/-                                                                                                         |       |         |
|                                                                                               | PLAG1               | 0.01, 1.0/-                                                       |           | 0.23, 0.3/0.9                                                       | 0.01, 1.0/-                                                        | 0.05, 0.8/-                                                                                 | 0.03, 0.9/-                                                                                                          |       |         |
|                                                                                               | SCD                 | -0.9, 0.7/-                                                       |           | -0.07, 0.7/-                                                        | -0.04, 0.9/-                                                       | -0.08, 0.7/-                                                                                | -0.07, 0.7/-                                                                                                         |       |         |
| LDL-C                                                                                         | DPP4                | <b>0.51, 0.01/0.03</b>                                            |           | -0.46, 0.02/0.06                                                    | 0.12, 0.6/-                                                        | 0.08, 0.7/-                                                                                 | 0.11, 0.6/-                                                                                                          |       |         |
|                                                                                               | PLAG1               | 0.45, 0.03/0.06                                                   |           | -0.37, 0.06/0.1                                                     | 0.13, 0.5/-                                                        | 0.14, 0.5/-                                                                                 | 0.15, 0.5/-                                                                                                          |       |         |
|                                                                                               | SCD                 | -0.10, 0.7/0.7                                                    |           | 0.14, 0.5/0.5                                                       | 0.18, 0.4/-                                                        | -0.20, 0.3/0.9                                                                              | -0.14, 0.5/-                                                                                                         |       |         |
| TG                                                                                            | DPP4                | -0.21, 0.3/0.9                                                    |           | 0.03, 0.9/-                                                         | -0.02, 0.9/-                                                       | 0.13, 0.5/-                                                                                 | 0.18, 0.4/-                                                                                                          |       |         |
|                                                                                               | PLAG1               | -0.14, 0.5/-                                                      |           | -0.17, 0.4/-                                                        | 0.07, 0.7/-                                                        | 0.05, 0.8/-                                                                                 | 0.04, 0.8/-                                                                                                          |       |         |
|                                                                                               | SCD                 | -0.07, 0.7/-                                                      |           | -0.09, 0.7/-                                                        | -0.13, 0.5/-                                                       | 0.06, 0.8/-                                                                                 | 0.06, 0.8/-                                                                                                          |       |         |
| HDL-C/TC                                                                                      | DPP4                | -0.13, 0.6/-                                                      |           | 0.32, 0.1/0.2                                                       | -0.31, 0.1/0.3                                                     | -0.21, 0.3/0.9                                                                              | -0.18, 0.4/-                                                                                                         |       |         |
|                                                                                               | PLAG1               | -0.30, 0.2/0.6                                                    |           | 0.42, 0.03/0.1                                                      | -0.01, 1.0/-                                                       | 0.03, 0.9/-                                                                                 | 0.01, 1.0/-                                                                                                          |       |         |
|                                                                                               | SCD                 | -0.08, 0.7/-                                                      |           | -0.11, 0.6/0.6                                                      | 0.01, 0.9/-                                                        | -0.08, 0.7/-                                                                                | -0.09, 0.7/-                                                                                                         |       |         |
| AUC Glc                                                                                       | DPP4                | 0.11, 0.6/-                                                       |           | -0.11, 0.6/-                                                        | 0.34, 0.1/0.3                                                      | 0.34, 0.1/0.3                                                                               | 0.21, 0.3/0.9                                                                                                        |       |         |
|                                                                                               | PLAG1               | 0.35, 0.1/0.3                                                     |           | 0.17, 0.4/-                                                         | 0.11, 0.6/0.6                                                      | 0.05, 0.8/-                                                                                 | 0.05, 0.8/-                                                                                                          |       |         |
|                                                                                               | SCD                 | -0.01, 1.0/-                                                      |           | -0.04, 0.8/-                                                        | -0.26, 0.2/0.4                                                     | 0.16, 0.5/-                                                                                 | 0.15, 0.5/-                                                                                                          |       |         |
| AUC insulin                                                                                   | DPP4                | 0.43, 0.06/0.2                                                    |           | -0.25, 0.3/0.6                                                      | 0.42, 0.06/0.2                                                     | 0.25, 0.3/0.6                                                                               | 0.21, 0.4/0.8                                                                                                        |       |         |
|                                                                                               | PLAG1               | 0.41, 0.07/0.2                                                    |           | -0.28, 0.2/0.6                                                      | 0.10, 0.7/-                                                        | 0.13, 0.6/0.6                                                                               | 0.16, 0.5/0.8                                                                                                        |       |         |
|                                                                                               | SCD                 | 0.07, 0.8/0.8                                                     |           | 0.19, 0.4/0.6                                                       | -0.13, 0.6/-                                                       | 0.31, 0.2/0.6                                                                               | 0.33, 0.1/0.3                                                                                                        |       |         |
| AUC leptin                                                                                    | DPP4                | 0.42, 0.07/0.2                                                    |           | -0.16, 0.5/-                                                        | 0.32, 0.2/0.6                                                      | 0.18, 0.4/-                                                                                 | 0.02, 0.9/-                                                                                                          |       |         |
|                                                                                               | PLAG1               | 0.26, 0.3/0.3                                                     |           | -0.25, 0.3/0.9                                                      | 0.13, 0.6/0.8                                                      | 0.16, 0.5/-                                                                                 | 0.17, 0.5/-                                                                                                          |       |         |
|                                                                                               | SCD                 | -0.36, 0.1/0.2                                                    |           | -0.13, 0.6/-                                                        | -0.18, 0.4/0.8                                                     | 0.20, 0.4/-                                                                                 | 0.17, 0.4/-                                                                                                          |       |         |
| AUC leptin receptor                                                                           | DPP4                | -0.14, 0.5/0.6                                                    |           | 0.13, 0.5/-                                                         | -0.29, 0.2/0.6                                                     | -0.15, 0.5/-                                                                                | -0.01, 1.0/-                                                                                                         |       |         |
|                                                                                               | PLAG1               | 0.24, 0.3/0.6                                                     |           | 0.08, 0.7/-                                                         | -0.06, 0.8/-                                                       | 0.05, 0.8/-                                                                                 | 0.08, 0.7/-                                                                                                          |       |         |
|                                                                                               | SCD                 | 0.28, 0.2/ 0.6                                                    |           | 0.11, 0.6/-                                                         | 0.09, 0.7/-                                                        | -0.03, 0.9/-                                                                                | -0.01, 1.0/-                                                                                                         |       |         |
| Significant correlates after Benjamini-Hochberg procedure (p <sup>BH</sup> <0.05) are bolded. |                     |                                                                   |           |                                                                     |                                                                    |                                                                                             |                                                                                                                      |       |         |
| PLAG1                                                                                         | 8q12.1<br>8150881   | 6.06±0.41                                                         | 6.38±0.40 | -1.25                                                               | 0.01/0.3                                                           | 5.80±0.32                                                                                   | 5.65±0.43                                                                                                            | 1.11  | 0.9/1.0 |
| SCD                                                                                           | 10q24.31<br>7929816 | 6.82±0.63                                                         | 6.83±0.54 | -1.00                                                               | 0.4/0.8                                                            | 6.46±0.63                                                                                   | 6.55±0.46                                                                                                            | -1.06 | 0.7/1.0 |

The expression of genes is given here as log<sub>2</sub> of the raw expression data.
